# Supplementary material
Source: publisher figshare collection journal article supplement (https://acs.figshare.com/ndownloader/files/17513096)

## Supporting Information

for

# Molecular Approach to Enhance Thermal Conductivity in Electrically Conductive Adhesives

Li-Ting Tseng, Ren-Huai Jhang, Jing-Qian Ho and Chun-Hu Chen\*

*Department of Chemistry, National Sun Yat-sen University, Kaohsiung, Taiwan 80424*

E-mail: chunhu.chen@mail.nsysu.edu.tw

Figure S-1. The characterization of the as-synthesized AgEH. (a) The XRD patterns of the prepared AgEH correspond well to the database signals. (b) The IR spectra of AgEH completely match with commercial standards.

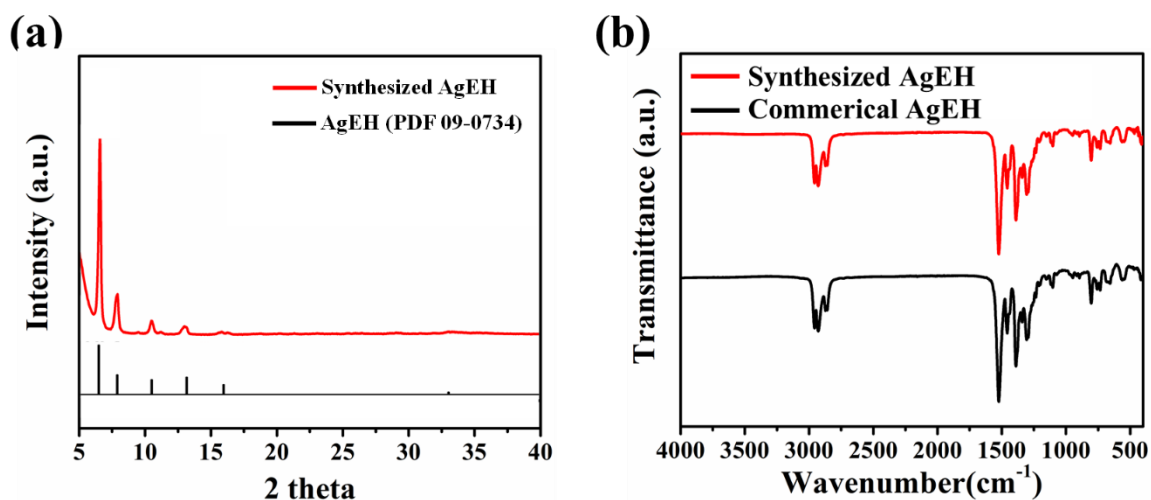

Figure S-2. The SEM images of the dendrite-like Ag aggregates.

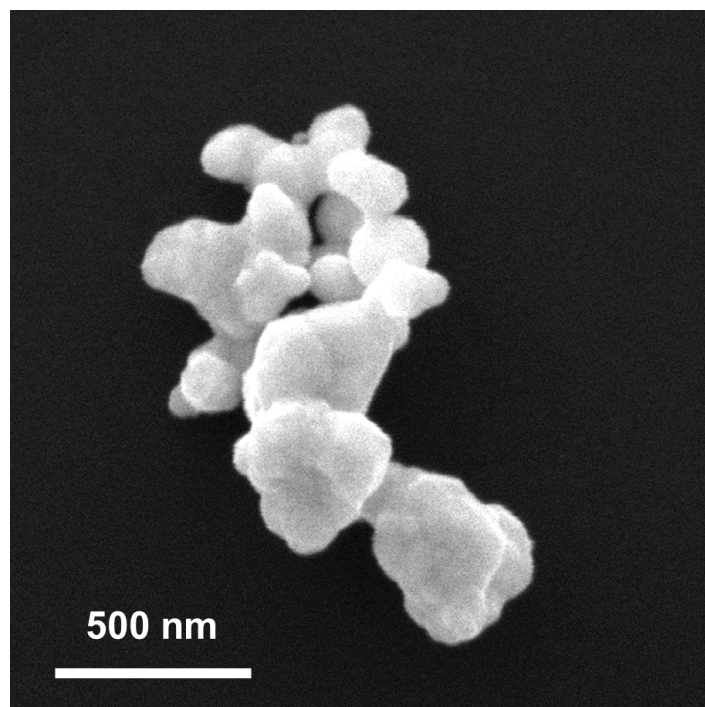

Figure S-3. The DSC results of mixing the epoxy and curing agents only. The data show exothermic peak of epoxy curing around 120°C.

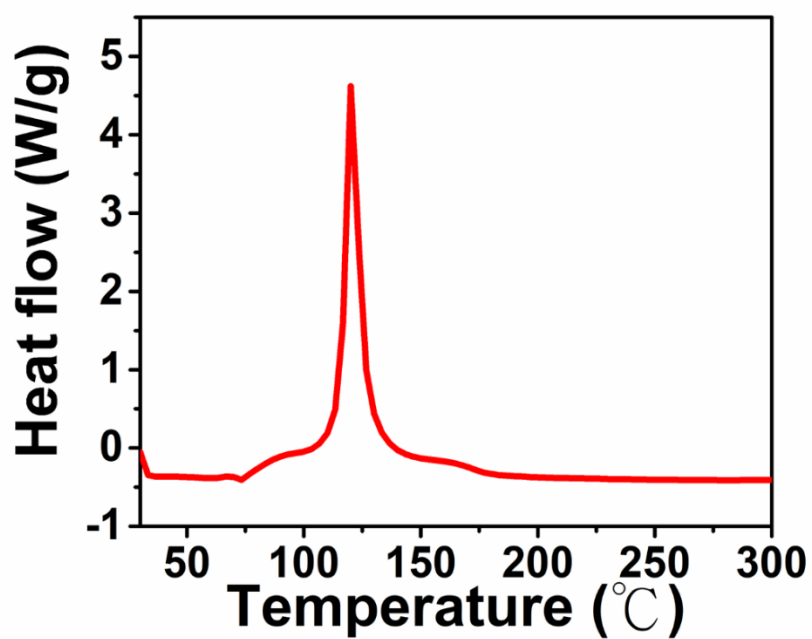

Figure S-4. Size distribution based on the SEM images of AgEH-yielded particles with the varied AgEH addition. The SEM images of each samples are identical to Fig. 4. (a) The 1.75 wt% samples showing the average diameter of  $13.3 \pm 2.9$  nm; (b) the 3.5 wt% samples for  $15.9 \pm 4.4$  nm; (c) the 7 wt% samples for  $46.5 \pm 30.8$  nm.

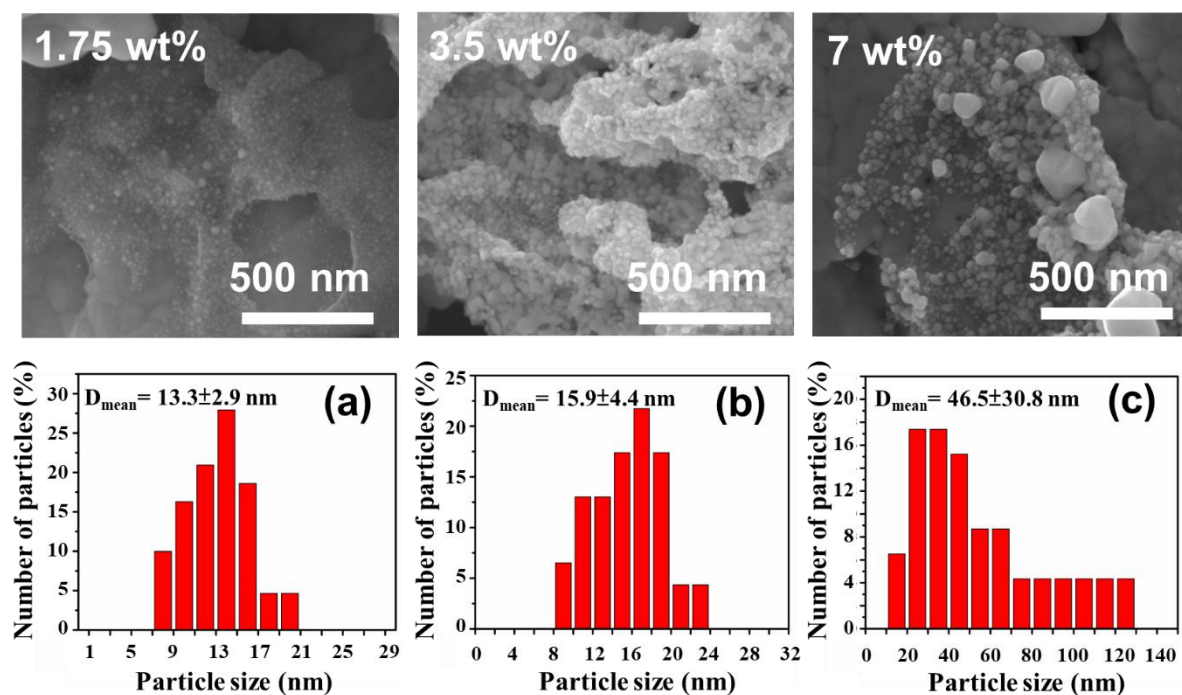

Figure S-5. The SEM images show the ultrafine Ag nanoparticles are mainly embedded in the resin matrix.

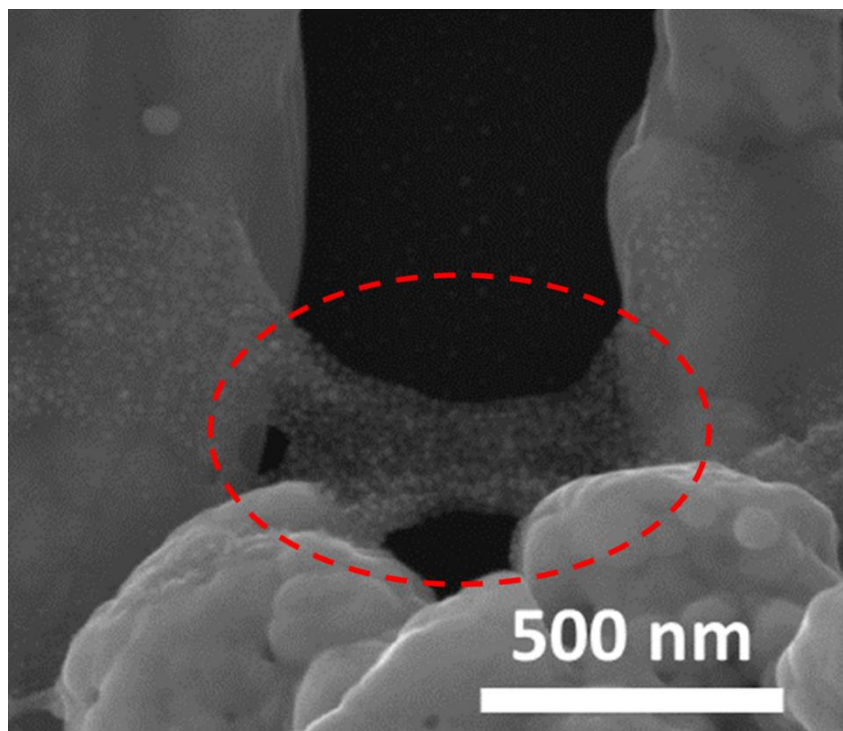

Figure S-6: The typical EDXS results of AgEH-yielded nanoparticles. The spectra of point 1 demonstrate that the as-observed particles are comprised of Ag with the background signals of Si substrates; point 2 shows only the background signals without Ag.

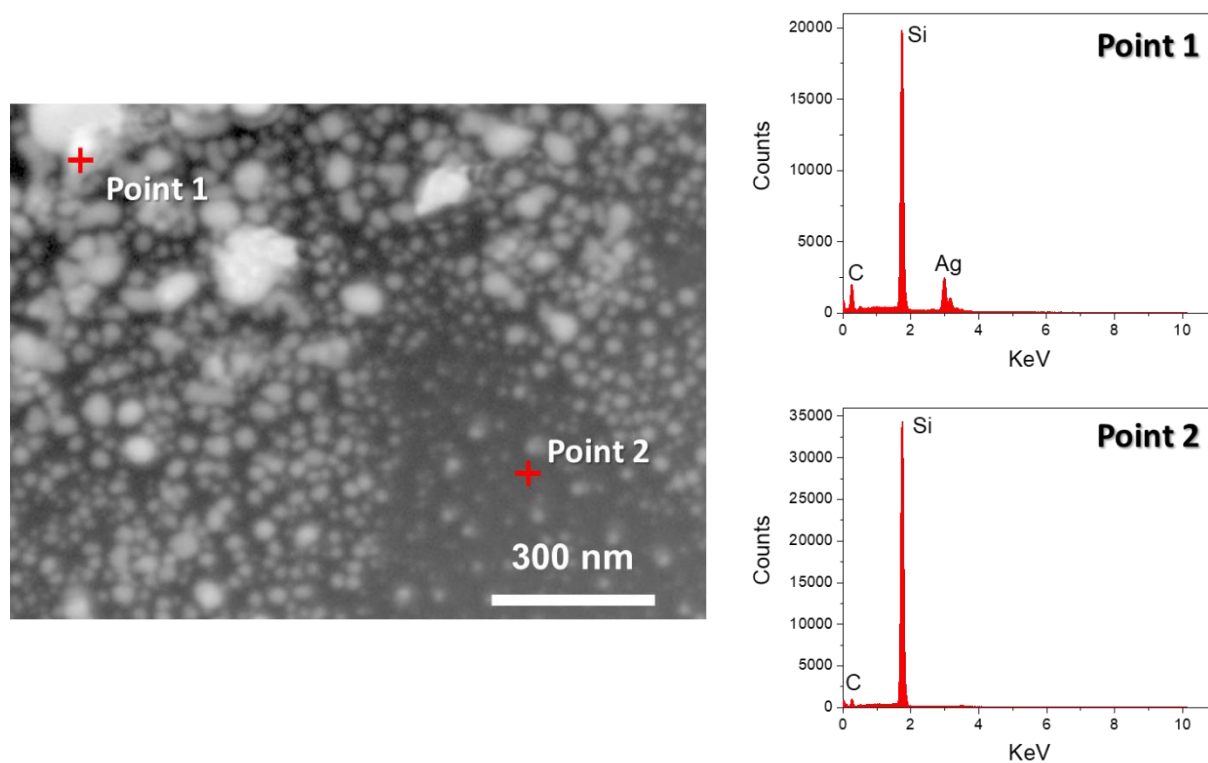

Fig. S-7. The TPD-MS of AgEH thermal decomposition in Ar. The intense  $m/z$  44 corresponds to  $\text{CO}_2$  release.

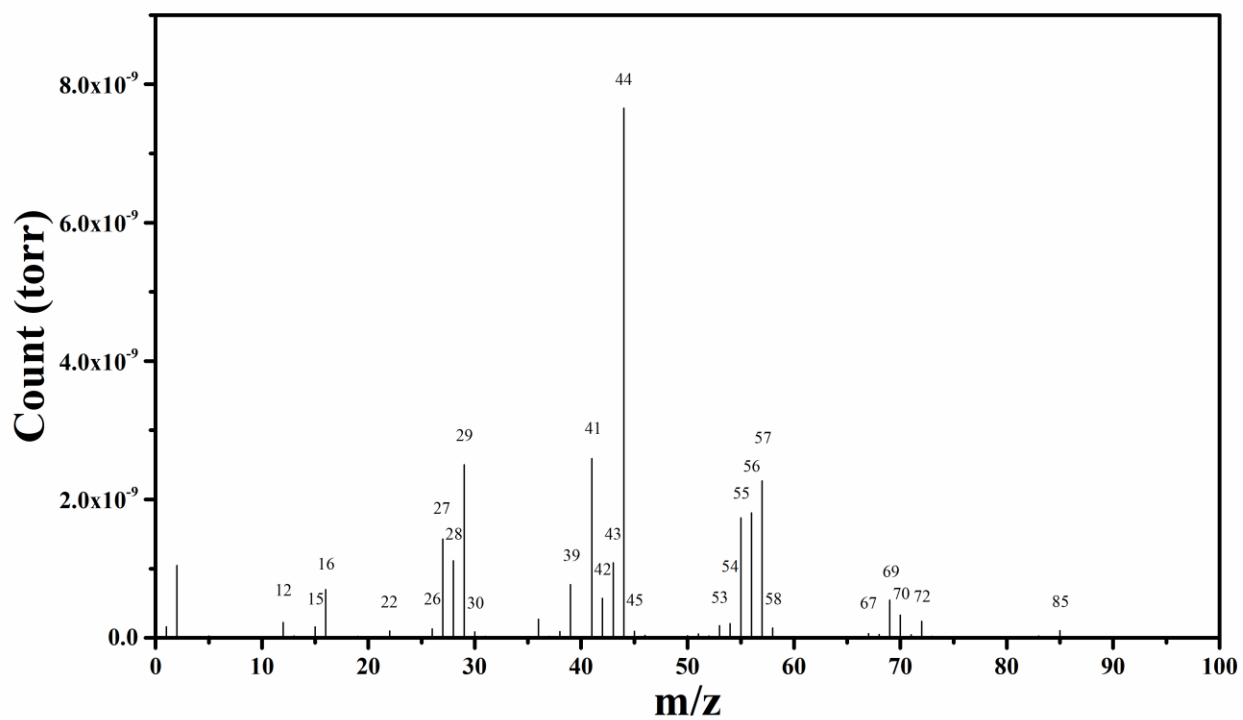

Supplement: Supplementary file 1 [file 17513096]
